# Supplementary material for: Current progress on bio-based polymers and their future trends
Source: PubMed Central journal article supplement (PMC5151099; doi:10.1186/2194-0517-2-8), 2013-03-18
Supplement: 40204_2012_10_MOESM1_ESM.pdf [file 40204_2012_10_MOESM1_ESM.pdf]

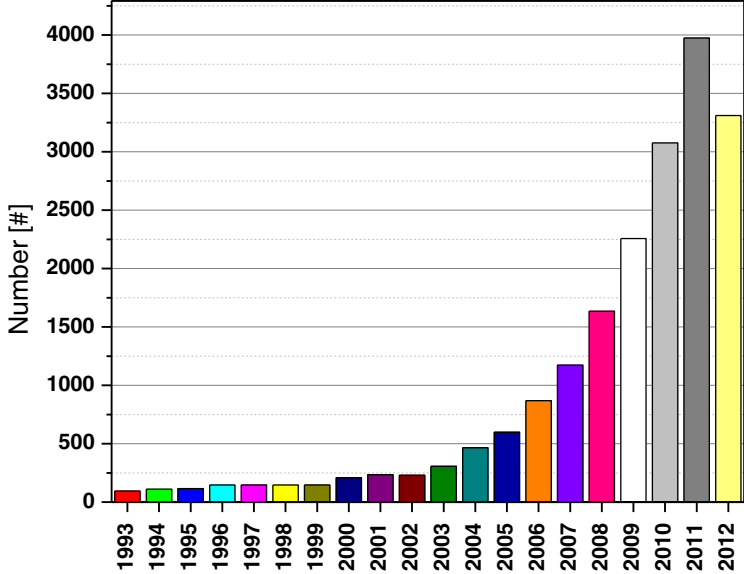

**a: (Source: ISI web of sciences)**

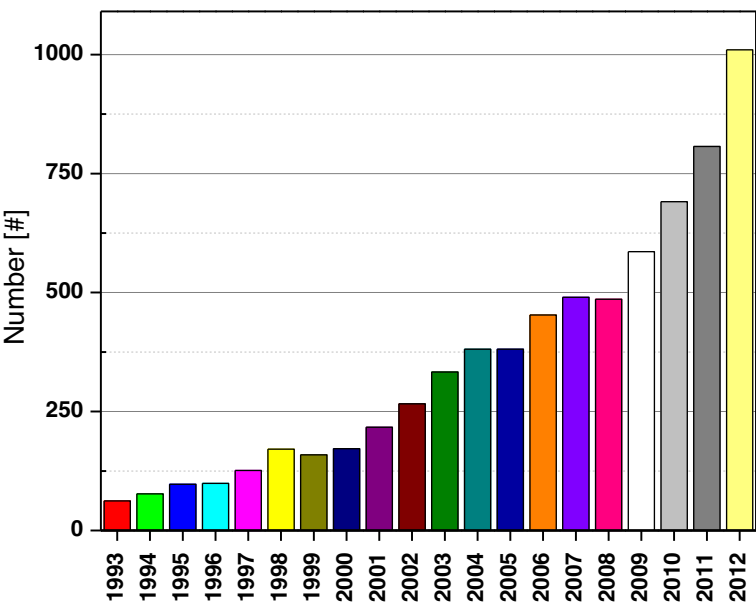

**b: (Source: Thomas Innovations)**
