# Supplementary material for: Current progress on bio-based polymers and their future trends
Source: PubMed Central journal article supplement (PMC5151099; doi:10.1186/2194-0517-2-8), 2013-03-18
Supplement: 40204_2012_10_MOESM2_ESM.pdf [file 40204_2012_10_MOESM2_ESM.pdf]

# Production of Biobased Polymers

```
graph TD; A[Production of Biobased Polymers] --> B[Polymers from Agro resources  
(By extraction and separation)]; A --> C[From micro-organisms  
(by fermentation)]; A --> D[From biotechnology via  
conventional synthesis]; B --> E[Polysaccharides and Lipids  
(Starch, Cellulose, Alginates)]; C --> F[Polyhydroxyalkanoates  
(mcl-PHA, PHB, PHB-co-V)]; D --> G["Poly lactides , PBS, PBS,  
PE,PTT,PPP"];
```

**Polymers from Agro resources  
(By extraction and separation)**

**Polysaccharides and Lipids  
(Starch, Cellulose, Alginates)**

**From micro-organisms  
(by fermentation)**

**Polyhydroxyalkanoates  
(mcl-PHA, PHB, PHB-co-V)**

**From biotechnology via  
conventional synthesis**

**Poly lactides , PBS, PBS,  
PE,PTT,PPP**
